# Supplementary material for: Are Undernutrition and Obesity Associated with Post-Discharge Mortality and Re-Hospitalization after Hospitalization with Community-Acquired Pneumonia?
Source: MDPI journal article supplement (doi:10.3390/nu14224906), 2022-11-19
Supplement: s1 [file s1]

**Supplementary Table S1.** Characteristics during hospital admission and outcome measures among eligible and ineligible patients hospitalized with community-acquired pneumonia.

|                                                                                                                                                                                                                                                                                                                                                                                                                                                                                                                                                              | Eligible patients<br>(n=323) | Ineligible patients (n=397) | p-value |
|--------------------------------------------------------------------------------------------------------------------------------------------------------------------------------------------------------------------------------------------------------------------------------------------------------------------------------------------------------------------------------------------------------------------------------------------------------------------------------------------------------------------------------------------------------------|------------------------------|-----------------------------|---------|
| Age, years                                                                                                                                                                                                                                                                                                                                                                                                                                                                                                                                                   | 69.8±13.6                    | 70.0±15.2                   | 0.78    |
| Female sex                                                                                                                                                                                                                                                                                                                                                                                                                                                                                                                                                   | 156 (48.3)                   | 192 (48.5)                  | 0.96    |
| <b>Comorbidities</b>                                                                                                                                                                                                                                                                                                                                                                                                                                                                                                                                         |                              |                             |         |
| Charlson Comorbidity index                                                                                                                                                                                                                                                                                                                                                                                                                                                                                                                                   | 4.3±2.5                      | 4.4±2.8                     | 0.81    |
| <b>Laboratory characteristics</b>                                                                                                                                                                                                                                                                                                                                                                                                                                                                                                                            |                              |                             |         |
| C-reactive protein, mg/L                                                                                                                                                                                                                                                                                                                                                                                                                                                                                                                                     | 97.3 (35.8-159.7)            | 108.2 (47.2-180.7)          | 0.07    |
| <b>Severity characteristics</b>                                                                                                                                                                                                                                                                                                                                                                                                                                                                                                                              |                              |                             |         |
| CURB-65                                                                                                                                                                                                                                                                                                                                                                                                                                                                                                                                                      |                              |                             | 0.23    |
| Mild                                                                                                                                                                                                                                                                                                                                                                                                                                                                                                                                                         | 161 (57.1)                   | 188 (51.5)                  |         |
| Moderate                                                                                                                                                                                                                                                                                                                                                                                                                                                                                                                                                     | 95 (33.7)                    | 130 (35.6)                  |         |
| Severe                                                                                                                                                                                                                                                                                                                                                                                                                                                                                                                                                       | 26 (9.2)                     | 47 (12.9)                   |         |
| Length of stay, days                                                                                                                                                                                                                                                                                                                                                                                                                                                                                                                                         | 5.5 (3.4-9.0)                | 5.2 (3.3-8.5)               | 0.70    |
| ICU admission                                                                                                                                                                                                                                                                                                                                                                                                                                                                                                                                                | 8 (2.5)                      | 18 (4.7)                    | 0.13    |
| <b>Outcomes</b>                                                                                                                                                                                                                                                                                                                                                                                                                                                                                                                                              |                              |                             |         |
| <b>Re-hospitalization</b>                                                                                                                                                                                                                                                                                                                                                                                                                                                                                                                                    |                              |                             |         |
| 30-day                                                                                                                                                                                                                                                                                                                                                                                                                                                                                                                                                       | 74 (22.9)                    | 87 (21.9)                   | 0.75    |
| 90-day                                                                                                                                                                                                                                                                                                                                                                                                                                                                                                                                                       | 97 (30.0)                    | 110 (27.9)                  | 0.52    |
| 180-day                                                                                                                                                                                                                                                                                                                                                                                                                                                                                                                                                      | 129 (39.9)                   | 155 (39.0)                  | 0.81    |
| <b>Mortality</b>                                                                                                                                                                                                                                                                                                                                                                                                                                                                                                                                             |                              |                             |         |
| 30-day                                                                                                                                                                                                                                                                                                                                                                                                                                                                                                                                                       | 11 (3.4)                     | 18 (4.5)                    | 0.44    |
| 90-day                                                                                                                                                                                                                                                                                                                                                                                                                                                                                                                                                       | 25 (7.7)                     | 42 (10.6)                   | 0.19    |
| 180-day                                                                                                                                                                                                                                                                                                                                                                                                                                                                                                                                                      | 38 (11.8)                    | 54 (13.9)                   | 0.40    |
| <p>Patients were considered eligible if they were not participating in our physical training intervention or if they had sufficient data to answer the research question (categorizing into relevant groups). Differences between groups were evaluated using t-test and Kruskal Wallis test for normal distributed variables and non-normally distributed variables, respectively. For categorical variables Pearson chi-square tests were used. Data are presented as median (IQR), mean ±SD and n (%). P-values &lt; 0.05 are considered significant.</p> |                              |                             |         |

**Supplementary Table S2.** Differences in characteristics during admission among undernourished, well-nourished, overweight, and obese patients hospitalized with community-acquired pneumonia.

|                                                                                                                                                                                                                                                                                                                                                                                                                                     | Well-nourished<br>vs.<br>undernourished | p-<br>value | Well-<br>nourished<br>vs.<br>overweight | p-<br>value | Well-<br>nourished<br>vs.<br>obese | p-<br>value | Overweight<br>vs.<br>under-<br>nourished | p-<br>value | Overweight<br>vs.<br>obese | p-<br>value | Underweight<br>vs.<br>obese | p-<br>value |
|-------------------------------------------------------------------------------------------------------------------------------------------------------------------------------------------------------------------------------------------------------------------------------------------------------------------------------------------------------------------------------------------------------------------------------------|-----------------------------------------|-------------|-----------------------------------------|-------------|------------------------------------|-------------|------------------------------------------|-------------|----------------------------|-------------|-----------------------------|-------------|
| Age, years                                                                                                                                                                                                                                                                                                                                                                                                                          | -5.9 (-11.8; 0.02)                      | 0.051       | -0.2 (-5.2; 4.8)                        | 1.00        | 3.5 (-2.0; 9.0)                    | 0.35        | -5.7 (-11.3; -0.05)                      | 0.047       | 3.7 (-1.5; 8.9)            | 0.25        | -9.4 (-15.4; -3.4)          | <0.001      |
| Female sex                                                                                                                                                                                                                                                                                                                                                                                                                          | -14 (-37; 8)                            | 0.23        | 20 (-1; 41)                             | 0.07        | -8 (-30; 4)                        | 0.48        | -20 (-42; 2)                             | 0.08        | -14 (-35; 7)               | 0.20        | 6 (-16; 28)                 | 0.60        |
| BMI, kg/m <sup>2</sup>                                                                                                                                                                                                                                                                                                                                                                                                              | 3.3 (2.1; 4.5)                          | <0.001      | -4.5 (-5.5; -3.5)                       | <0.001      | -12.2 (-13.3; -11.1)               | <0.001      | 7.7 (6.6; 8.9)                           | <0.001      | -7.7 (-8.7; -6.6)          | <0.001      | -15.4 (-16.7; -14.2)        | <0.001      |
| Fat-free mass index, kg/m <sup>2</sup>                                                                                                                                                                                                                                                                                                                                                                                              | 2.0 (1.0; 3.0)                          | <0.001      | -1.6 (-2.5; 0.8)                        | <0.001      | -3.7 (-4.6; 2.8)                   | <0.001      | 3.6 (2.7; 4.5)                           | <0.001      | -2.1 (1.2; 2.9)            | <0.001      | -5.7 (-6.7; 4.7)            | <0.001      |
| <b>Comorbidities</b>                                                                                                                                                                                                                                                                                                                                                                                                                |                                         |             |                                         |             |                                    |             |                                          |             |                            |             |                             |             |
| Charlson comorbidity index                                                                                                                                                                                                                                                                                                                                                                                                          | -0.6 (-1.7; 0.5)                        | 0.54        | 0.7 (-0.2; 1.6)                         | 0.22        | 0.7 (-0.3; 1.7)                    | 0.32        | -1.3 (-2.3; -0.2)                        | 0.01        | 0.02 (-0.9; 1.0)           | 1.00        | 2.3 (-0.1; 2.4)             | 0.02        |
| <b>Laboratory characteristics</b>                                                                                                                                                                                                                                                                                                                                                                                                   |                                         |             |                                         |             |                                    |             |                                          |             |                            |             |                             |             |
| C-reactive protein, mg/L                                                                                                                                                                                                                                                                                                                                                                                                            | 35 (-60; 8)                             | 0.13        | -15 (-75; 25)                           | 0.84        | -62 (-56; 38)                      | 1.00        | -25 (-53; 21)                            | 0.41        | 86 (-33; 45)               | 0.80        | 36 (-7; 61)                 | 0.12        |
| <b>Severity characteristics</b>                                                                                                                                                                                                                                                                                                                                                                                                     |                                         |             |                                         |             |                                    |             |                                          |             |                            |             |                             |             |
| CURB-65 index                                                                                                                                                                                                                                                                                                                                                                                                                       |                                         |             |                                         |             |                                    |             |                                          |             |                            |             |                             |             |
| Mild                                                                                                                                                                                                                                                                                                                                                                                                                                | 11 (-19; 41)                            | 0.52        | -4 (-28; 20)                            | 0.75        | -8 (-35; 19)                       | 0.56        | 15 (-14; 44)                             | 0.39        | -4 (-29; 21)               | 0.76        | -19 (-50; 12)               | 0.31        |
| Moderate                                                                                                                                                                                                                                                                                                                                                                                                                            | -3 (-21; 15)                            | 0.75        | 5 (-12; 22)                             | 0.55        | 11 (-8; 30)                        | 0.25        | -8 (-26; 10)                             | 0.39        | 6 (-12; 24)                | 0.52        | 14 (-6; 34)                 | 0.18        |
| Severe                                                                                                                                                                                                                                                                                                                                                                                                                              | -8 (-40; 24)                            | 0.65        | -1 (-29; 27)                            | 0.95        | -3 (-33; 27)                       | 0.85        | -7 (-38; 24)                             | 0.66        | -2 (30; 26)                | 0.89        | 5 (-27; 37)                 | 0.76        |
| Length of stay, days                                                                                                                                                                                                                                                                                                                                                                                                                | 6 (-33; 33)                             | 0.97        | 8 (-23; 31)                             | 0.89        | -3 (-34; 29)                       | 1.00        | -13 (-37; 21)                            | 0.69        | -6 (-22; 42)               | 0.97        | -8 (-30; 35)                | 0.92        |
| Differences between groups were evaluated using Pearson chi-square tests presented as absolute difference in percentage points for categorical variables and oneway ANOVA for continuous variables presented as absolute differences or relative percentage differences with 95% confidence intervals and p-value for normally and non-normally distributed variables, respectively. Variables were log-transformed as appropriate. |                                         |             |                                         |             |                                    |             |                                          |             |                            |             |                             |             |

**Supplementary Table S3.** Comorbidities among undernourished, well-nourished, overweight, and obese patients hospitalized with community-acquired pneumonia.

|                         | <b>Total sample<br/>(n=323)</b> | <b>Undernourished<br/>(n=57)</b> | <b>Well-nourished<br/>(n=83)</b> | <b>Overweight<br/>(n=107)</b> | <b>Over-nourished<br/>(n=76)</b> |
|-------------------------|---------------------------------|----------------------------------|----------------------------------|-------------------------------|----------------------------------|
| <b>Comorbidities</b>    |                                 |                                  |                                  |                               |                                  |
| COPD                    | 112 (34.7)                      | 33 (57.9)                        | 27 (32.5)                        | 32 (29.9)                     | 20 (26.3)                        |
| Cardiovascular diseases | 95 (29.4)                       | 19 (33.3)                        | 22 (29.9)                        | 32 (29.9)                     | 22 (29.0)                        |
| Cancer                  | 56 (17.3)                       | 16 (28.1)                        | 16 (19.3)                        | 13 (12.2)                     | 11 (14.5)                        |
| Diabetes                | 50 (15.5)                       | 7 (12.3)                         | 10 (12.1)                        | 15 (14.0)                     | 18 (23.7)                        |
| Data shown as n (%).    |                                 |                                  |                                  |                               |                                  |

**Supplementary Table S4.** Differences in comorbidities among undernourished, well-nourished, overweight, and obese patients hospitalized with community-acquired pneumonia.

|                                          | Well-nourished<br>vs.<br>undernourished | p     | Well-nourished<br>vs.<br>overweight | p    | Well-nourished<br>vs.<br>obese | p    | Overweight vs.<br>under-nourished | P    | Overweight vs.<br>obese | P    | Underweight vs.<br>obese | p    |
|------------------------------------------|-----------------------------------------|-------|-------------------------------------|------|--------------------------------|------|-----------------------------------|------|-------------------------|------|--------------------------|------|
| Chronic obstructive<br>pulmonary disease | -25 (-49; -0.01)                        | 0.053 | 3 (-21; 27)                         | 0.80 | 7 (-19; 33)                    | 0.60 | -28 (-51; -5)                     | 0.02 | 4 (-21; 29)             | 0.76 | 32 (6; 58)               | 0.02 |
| Cardiovascular<br>diseases               | -3 (-32; 26)                            | 0.84  | 0 (-25; 25)                         | 1.00 | 1 (-24; 26)                    | 0.94 | -3 (-29; 23)                      | 0.82 | 1 (-24; 26)             | 0.94 | 4 (-24; 32)              | 0.78 |
| Cancer                                   | -9 (-38; 20)                            | 0.54  | 7 (-19; 33)                         | 0.61 | 4 (-25; 33)                    | 0.79 | -16 (-0.44; 12)                   | 0.29 | -3 (-31; 25)            | 0.83 | 13 (-17; 43)             | 0.43 |
| Diabetes                                 | 0 (-31; 31)                             | 1.00  | -2 (-29; 25)                        | 0.88 | -12 (-40; 16)                  | 0.44 | 2 (-28; 32)                       | 0.90 | -10 (-36; 16)           | 0.47 | -12 (-43; 19)            | 0.51 |

Differences between groups were evaluated using Pearson chi-square tests presented as absolute difference in percentage points for categorical variables and oneway ANOVA for continuous variables presented as absolute differences or relative percentage differences with 95% confidence intervals and p-value for normally and non-normally distributed variables, respectively. Variables were log-transformed as appropriate.

**Supplementary Table S5.** Characteristics during hospital admission and outcome measures among undernourished patients hospitalized with community-acquired pneumonia.

|                                                                                                                                                                                                                                                                                                                                         | Patients with BMI <18.5<br>kg/m <sup>2</sup><br>(n=15) | Patients with BMI >18.5<br>plus weight loss<br>(n=42) | p-value |
|-----------------------------------------------------------------------------------------------------------------------------------------------------------------------------------------------------------------------------------------------------------------------------------------------------------------------------------------|--------------------------------------------------------|-------------------------------------------------------|---------|
| Age, years                                                                                                                                                                                                                                                                                                                              | 72.4±10.9                                              | 76.5±13.7                                             | 0.30    |
| Female sex                                                                                                                                                                                                                                                                                                                              | 12 (80.0)                                              | 22 (52.4)                                             | 0.06    |
| <b>Comorbidities</b>                                                                                                                                                                                                                                                                                                                    |                                                        |                                                       |         |
| Charlson Comorbidity Index                                                                                                                                                                                                                                                                                                              | 4.7±1.5                                                | 5.3±2.4                                               | 0.37    |
| COPD                                                                                                                                                                                                                                                                                                                                    | 14 (93.3)                                              | 19 (45.2)                                             | 0.001   |
| Cardiovascular diseases                                                                                                                                                                                                                                                                                                                 | 2 (13.3)                                               | 17 (40.5)                                             | 0.07    |
| Cancer                                                                                                                                                                                                                                                                                                                                  | 6 (40.0)                                               | 10 (23.8)                                             | 0.23    |
| Diabetes                                                                                                                                                                                                                                                                                                                                | 1 (6.7)                                                | 6 (14.3)                                              | 0.44    |
| <b>Laboratory characteristics</b>                                                                                                                                                                                                                                                                                                       |                                                        |                                                       |         |
| C-reactive protein, mg/L                                                                                                                                                                                                                                                                                                                | 126.7 (87.2-138.2)                                     | 132.6 (52.2-183.4)                                    | 0.50    |
| <b>Severity characteristics</b>                                                                                                                                                                                                                                                                                                         |                                                        |                                                       |         |
| CURB-65                                                                                                                                                                                                                                                                                                                                 |                                                        |                                                       |         |
| Mild                                                                                                                                                                                                                                                                                                                                    | 3 (21.4)                                               | 3 (8.3)                                               | 0.35    |
| Moderate                                                                                                                                                                                                                                                                                                                                | 10 (71.4)                                              | 27 (75.0)                                             |         |
| Severe                                                                                                                                                                                                                                                                                                                                  | 1 (7.1)                                                | 6 (16.7)                                              |         |
| Length of stay, days                                                                                                                                                                                                                                                                                                                    | 6.3 (4.0-17.5)                                         | 5.3 (3.5-10.0)                                        | 0.27    |
| ICU admission                                                                                                                                                                                                                                                                                                                           | -                                                      | -                                                     |         |
| <b>Outcomes</b>                                                                                                                                                                                                                                                                                                                         |                                                        |                                                       |         |
| <b>Re-hospitalization</b>                                                                                                                                                                                                                                                                                                               |                                                        |                                                       |         |
| 30-day                                                                                                                                                                                                                                                                                                                                  | 6 (40.0)                                               | 10 (23.8)                                             | 0.32    |
| 90-day                                                                                                                                                                                                                                                                                                                                  | 7 (46.7)                                               | 13 (31.0)                                             | 0.27    |
| 180-day                                                                                                                                                                                                                                                                                                                                 | 9 (60.0)                                               | 21 (50.0)                                             | 0.56    |
| <b>Mortality</b>                                                                                                                                                                                                                                                                                                                        |                                                        |                                                       |         |
| 30-day                                                                                                                                                                                                                                                                                                                                  | 3 (20.0)                                               | 4 (9.5)                                               | 0.29    |
| 90-day                                                                                                                                                                                                                                                                                                                                  | 4 (26.7)                                               | 9 (21.4)                                              | 0.68    |
| 180-day                                                                                                                                                                                                                                                                                                                                 | 5 (33.3)                                               | 12 (28.6)                                             | 0.73    |
| Data are presented as median (IQR), mean ±SD and n (%). Differences between groups were evaluated using t-test and Kruskal Wallis test for normal distributed variables and non-normally distributed variables, respectively. For categorical variables Pearson chi-square tests were used. P-values < 0.05 are considered significant. |                                                        |                                                       |         |

**Supplementary Table S6.** Primary cause of re-hospitalization among undernourished, well-nourished, overweight, and obese patients after discharge from community-acquired pneumonia

| Admission cause         | Total sample<br>(n=129) | Undernourished<br>(n=30) | Well-nourished<br>(n=35) | Overweight<br>(n=30) | Obese<br>(n=34) |
|-------------------------|-------------------------|--------------------------|--------------------------|----------------------|-----------------|
| Pneumonia               | 35 (27.1)               | 7 (23.3)                 | 7 (20.0)                 | 12 (40.0)            | 9 (26.5)        |
| Pulmonary               | 36 (29.9)               | 10 (33.3)                | 10 (28.6)                | 6 (20.0)             | 10 (29.4)       |
| Cardiovascular          | 11 (8.5)                | 4 (13.3)                 | 4 (13.3)                 | 2 (6.7)              | 3 (8.8)         |
| Other                   | 47 (36.4)               | 9 (30.0)                 | 16 (45.7)                | 10 (33.3)            | 12 (35.3)       |
| Data presented as n (%) |                         |                          |                          |                      |                 |

**Supplementary Table S7.** Differences in cause of re-hospitalization among undernourished, well-nourished, overweight, and obese patients hospitalized with community-acquired pneumonia.

|                            | Well-nourished<br>vs.<br>undernourished | P    | Well-<br>nourished<br>vs.<br>overweight | P    | Well-<br>nourished<br>vs.<br>obese | P    | Overweight<br>vs.<br>under-<br>nourished | P    | Overweight<br>vs.<br>obese | P    | Underweight<br>vs.<br>obese | P    |
|----------------------------|-----------------------------------------|------|-----------------------------------------|------|------------------------------------|------|------------------------------------------|------|----------------------------|------|-----------------------------|------|
| Pulmonary                  | -3 (-54; 8)                             | 0.89 | -20 (-61; 21)                           | 0.37 | -6 (-47; 35)                       | 0.78 | 17 (-25; 59)                             | 0.45 | 14 (-26; 50)               | 0.50 | -3 (-43; 38)                | 0.89 |
| Pneumonia                  | -4 (-45; 37)                            | 0.85 | 9 (-34; 52)                             | 0.69 | 0 (-40; 40)                        | 1.00 | -13 (-56; 30)                            | 0.58 | -9 (-52; 57)               | 0.69 | 4 (-37; 45)                 | 0.85 |
| Cardiovascular<br>diseases | -7 (-54; 40)                            | 0.79 | -1 (-0.49; 47)                          | 0.97 | -3 (-49; 43)                       | 0.90 | -6 (-54; 42)                             | 0.82 | -2 (-0.49; 0.46)           | 0.94 | 4 (-42; 50)                 | 0.87 |
| Other                      | 16 (-23; 55)                            | 0.43 | 13 (-25; 51)                            | 0.51 | 11 (-25; 47)                       | 0.55 | 3 (-39; 45)                              | 0.89 | -2 (-42; 38)               | 0.92 | -5 (-45; 35)                | 0.81 |

**Supplementary Table S8.** Risk of re-hospitalization and mortality within 30, 90, and 180 days after discharge among undernourished, well-nourished, overweight (reference), and obese patients hospitalized with community-acquired pneumonia.

|                                                                                                                                                                                                                                                                                                                                                                                                                                                                 | Model 1<br>(unadjusted) |                | Model 2<br>(adjusted) |                |
|-----------------------------------------------------------------------------------------------------------------------------------------------------------------------------------------------------------------------------------------------------------------------------------------------------------------------------------------------------------------------------------------------------------------------------------------------------------------|-------------------------|----------------|-----------------------|----------------|
| <b>Re-hospitalization</b>                                                                                                                                                                                                                                                                                                                                                                                                                                       | <b>HR (95% CI)</b>      | <b>p-value</b> | <b>HR (95% CI)</b>    | <b>p-value</b> |
| <b>30-day</b>                                                                                                                                                                                                                                                                                                                                                                                                                                                   |                         |                |                       |                |
| Undernourished                                                                                                                                                                                                                                                                                                                                                                                                                                                  | 1.5 (0.8; 2.6)          | 0.18           | 1.2 (0.7; 2.2)        | 0.52           |
| Well-nourished                                                                                                                                                                                                                                                                                                                                                                                                                                                  | 1.3 (0.7; 2.3)          | 0.36           | 1.3 (0.7; 2.2)        | 0.40           |
| Overweight                                                                                                                                                                                                                                                                                                                                                                                                                                                      | Ref.                    |                | Ref.                  |                |
| Obese                                                                                                                                                                                                                                                                                                                                                                                                                                                           | 1.3 (0.7; 2.2)          | 0.40           | 1.4 (0.8; 2.5)        | 0.23           |
| <b>90-day</b>                                                                                                                                                                                                                                                                                                                                                                                                                                                   |                         |                |                       |                |
| Undernourished                                                                                                                                                                                                                                                                                                                                                                                                                                                  | 1.6 (1.0; 2.7)          | 0.06           | 1.3 (0.8; 2.1)        | 0.37           |
| Well-nourished                                                                                                                                                                                                                                                                                                                                                                                                                                                  | 1.5 (0.9; 2.4)          |                | 1.5 (0.9; 2.4)        | 0.11           |
| Overweight                                                                                                                                                                                                                                                                                                                                                                                                                                                      | Ref.                    |                | Ref.                  |                |
| Obese                                                                                                                                                                                                                                                                                                                                                                                                                                                           | 1.6 (1.0; 2.6)          | 0.054          | 1.8 (1.1; 2.9)        | 0.01           |
| <b>180-day</b>                                                                                                                                                                                                                                                                                                                                                                                                                                                  |                         |                |                       |                |
| Undernourished                                                                                                                                                                                                                                                                                                                                                                                                                                                  | 1.9 (1.3; 2.7)          | 0.002          | 1.5 (1.0; 2.2)        | 0.06           |
| Well-nourished                                                                                                                                                                                                                                                                                                                                                                                                                                                  | 1.5 (1.0; 2.2)          | 0.06           | 1.4 (1.0; 2.1)        | 0.08           |
| Overweight                                                                                                                                                                                                                                                                                                                                                                                                                                                      | Ref.                    |                | Ref.                  |                |
| Obese                                                                                                                                                                                                                                                                                                                                                                                                                                                           | 1.6 (1.2; 2)            | 0.02           | 1.8 (1.2; 2.6)        | 0.002          |
| <b>Mortality</b>                                                                                                                                                                                                                                                                                                                                                                                                                                                | <b>OR (95% CI)</b>      | <b>p-value</b> | <b>OR (95% CI)</b>    | <b>p-value</b> |
| <b>30-day</b>                                                                                                                                                                                                                                                                                                                                                                                                                                                   |                         |                |                       |                |
| Undernourished                                                                                                                                                                                                                                                                                                                                                                                                                                                  | 14.8 (1.8; 123.9)       | 0.01           | 8.3 (0.9; 73.1)       | 0.06           |
| Well-nourished                                                                                                                                                                                                                                                                                                                                                                                                                                                  | 4.0 (0.4; 38.9)         | 0.24           | 3.7 (0.4; 38.0)       | 0.27           |
| Overweight                                                                                                                                                                                                                                                                                                                                                                                                                                                      | Ref.                    |                | Ref.                  |                |
| Obese*                                                                                                                                                                                                                                                                                                                                                                                                                                                          | -                       |                | -                     |                |
| <b>90-day</b>                                                                                                                                                                                                                                                                                                                                                                                                                                                   |                         |                |                       |                |
| Undernourished                                                                                                                                                                                                                                                                                                                                                                                                                                                  | 7.6 (2.3; 24.6)         | 0.01           | 5.0 (1.5; 17.0)       | 0.01           |
| Well-nourished                                                                                                                                                                                                                                                                                                                                                                                                                                                  | 1.7 (0.4; 6.3)          | 0.47           | 1.6 (0.4; 6.2)        | 0.52           |
| Overweight                                                                                                                                                                                                                                                                                                                                                                                                                                                      | Ref.                    |                | Ref.                  |                |
| Obese                                                                                                                                                                                                                                                                                                                                                                                                                                                           | 1.1 (0.2; 4.9)          | 0.94           | 1.4 (0.29; 6.6)       | 0.69           |
| <b>180-day</b>                                                                                                                                                                                                                                                                                                                                                                                                                                                  |                         |                |                       |                |
| Undernourished                                                                                                                                                                                                                                                                                                                                                                                                                                                  | 8.7 (3.0; 25.1)         | <0.001         | 5.4 (1.8; 16.5)       | 0.003          |
| Well-nourished                                                                                                                                                                                                                                                                                                                                                                                                                                                  | 2.8 (0.9; 8.5)          | 0.07           | 2.7 (0.9; 8.6)        | 0.09           |
| Overweight                                                                                                                                                                                                                                                                                                                                                                                                                                                      | Ref.                    |                | Ref.                  |                |
| Obese                                                                                                                                                                                                                                                                                                                                                                                                                                                           | 1.7 (0.5; 6.0)          | 0.37           | 2.2 (0.6; 7.9)        | 0.22           |
| *none died. Cox regression was fitted for new hospital admission within 30 and 180 days after discharge with mortality as competing event. Logistic regression was fitted for mortality within hospital, and within 30 and 180 days after discharge. Estimates shown are sub-distributed hazard ratio (HR) and odds ratios (OR) with corresponding 95% confidence intervals (CI) and p-value.<br>Model 1: unadjusted. Model 2: adjusted for age, sex, and COPD. |                         |                |                       |                |
